# Supplementary material for: Development and implementation of a novel immune thrombocytopenia bleeding score for dogs
Source: PubMed Central journal article supplement — J Vet Intern Med. 2018 Apr 21;32(3):1041–50. doi: 10.1111/jvim.15089 (PMC5980571; doi:10.1111/jvim.15089), 2018-04-21
Supplement: JVIM-32-1041-s001.pdf [file JVIM-32-1041-s001.pdf]

**Supplemental Material S1.** Complete training course for correct implementation of the canine daily bleeding score assessment tool, DOGiBAT.

## ITP Bleeding Score Training Deck

1

### Scoring

- The score for the highest grade is entered into the appropriate section
- The grades are not additive
  - E.g. oral petechia = score of 1  
oral bleeding = score of 2  
\* if both are present, score is = 2 (not 3)

2

## Skin

- Grade 0 = Normal
- Grade 1 = Petechiae / ecchymoses  
single site  
(e.g. multiple petechiae on 1 leg = 1 site)
- Grade 2 = Petechiae / ecchymoses -  
> 1 anatomic site  
(e.g. petechiae on 2 legs = 2 sites)

3

## Skin

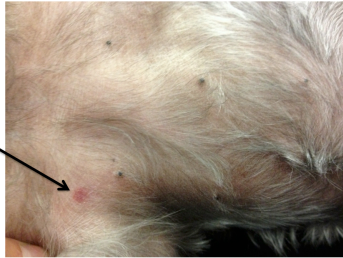

Grade 1 = Petechiae / ecchymoses - single anatomic site (e.g. 1 leg)

4

## Skin

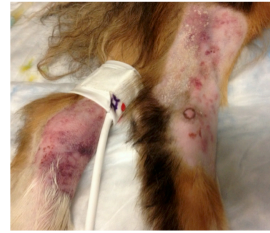

Grade 2 = Petechiae / ecchymoses  
> 1 anatomic site (e.g. 2 legs)

5

Catheter / venipuncture /  
other cutaneous bleed

- Grade 0 = Normal
- Grade 1 = Self-limiting, < 5 minutes
- Grade 2 = > 5 minutes and/or intervention to control (including pressure wrap)

6

Catheter / venipuncture /  
other cutaneous bleed

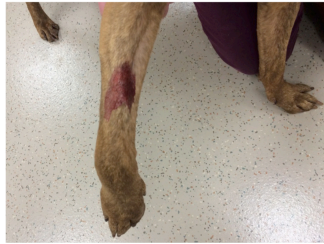

Grade 1 = Self-limiting, < 5 minutes

7

Catheter / venipuncture /  
other cutaneous bleed

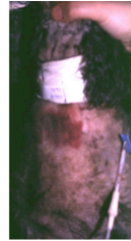

Grade 2 = > 5 minutes  
and/or intervention to control

8

## Oral mucosa

- Grade 0 = Normal
- Grade 1 = Petechiae
- Grade 2 = Frank hemorrhage

9

### Oral mucosa

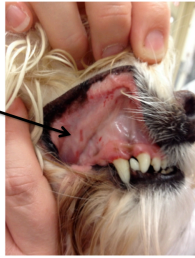

Grade 1 = Petechiae

10

### Oral mucosa

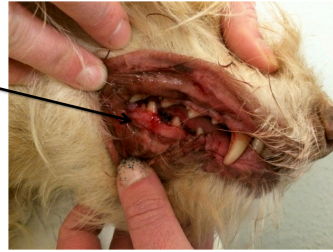

Grade 2 = Frank hemorrhage

11

## Intraocular

- Grade 0 = Normal
- Grade 1 = Fundusopic
  - If only unilateral hyphema, grade still = 2
- Grade 2 = Hyphema
  - If both fundusopic lesions and hyphema are present, grade = 2
  - If only unilateral hyphema, grade still = 2

12

## Intraocular

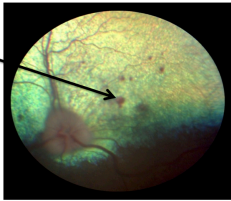

Grade 1 = Fundusopic

13

## Intraocular

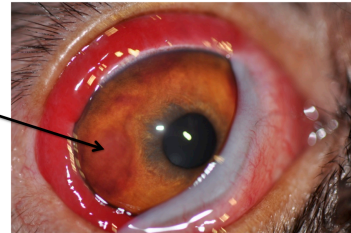

Grade 2 = Hyphema

14

## Epistaxis

- Grade 0 = Normal
- Grade 1 = Unilateral and < 5 minutes
- Grade 2 = Bilateral or > 5 minutes

15

## Epistaxis

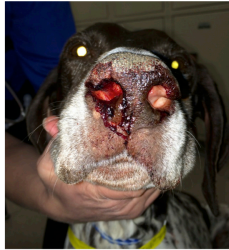

Grade 1 = Unilateral and < 5 minutes **16**

## Epistaxis

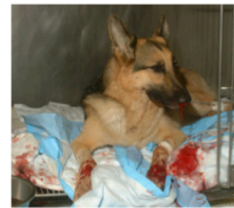

Grade 2 = Bilateral or > 5 minutes **17**

## Gastrointestinal

- Grade 0 = Normal
- Grade 1 = Positive fecal occult blood (Hema-Chek™ guaiac acid based test)
- Grade 2 = Hematemesis, hematochezia, and/or melena

18

## Gastrointestinal

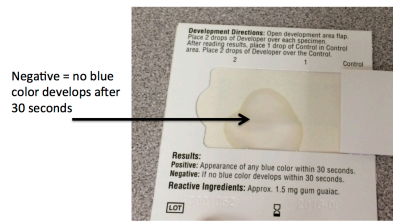

Grade 0 = Hema-Chek™ negative

19

## Gastrointestinal

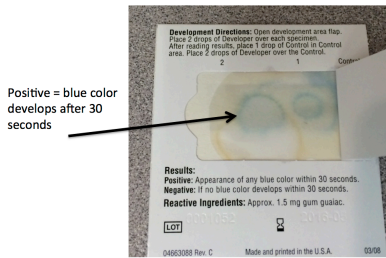

Grade 1 = Hema-Chek™ positive

20

## Gastrointestinal

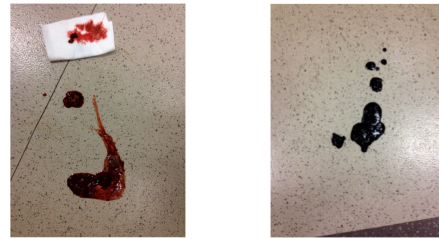

Grade 2 = Hematemesis, hematochezia,  
melena

21

## Urinary

- Grade 0 = Normal
- Grade 1 = No visible hematuria, but microscopic hematuria noted (turns dipstick green)
- Grade 2 = Macroscopic

22

## Urinary

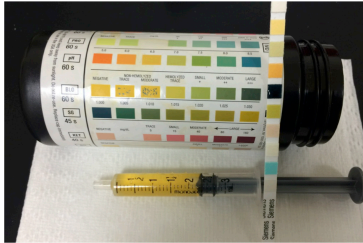

Grade 1 = No visible hematuria,  
but positive microscopic (dipstick)

23

## Urinary

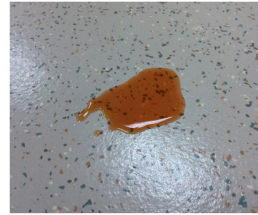

Grade 2 = Macroscopic

24



**Pulmonary hemorrhage  
(suspected / observed)**

- Grade 0 = Normal
  - No respiratory difficulties, no cough reported, thoracic radiographs clear
- Grade 1 = N/A
- Grade 2 = Yes
  - Cough/hemoptysis, increased respiratory rate/effort, increased pulmonary infiltrates on thoracic radiographs

25

**Pulmonary hemorrhage  
(suspected / observed)**

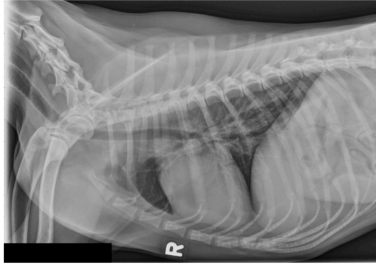

Grade 0 = normal, Grade 1 = N/A

26

**Pulmonary hemorrhage  
(suspected / observed)**

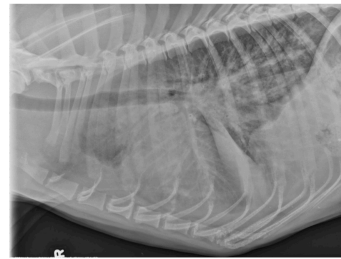

Grade 2 = Yes

27

### Intracranial hemorrhage (suspected / observed)

- Grade 0 = Normal
  - No evidence of neurologic dysfunction, no mentation changes, no cranial nerve changes
- Grade 1 = N/A
- Grade 2 = Yes
  - Mentation change, cranial nerve changes, evidence of cerebral hemorrhage on MRI

28

### Intracranial hemorrhage (suspected / observed)

- Normal mentation
- Normal cranial nerves
- No head tilt

Grade 0 = normal, Grade 1 = N/A

29

### Intracranial hemorrhage (suspected / observed)

- Abnormal mentation
- Abnormal cranial nerves
- Head tilt
- Nystagmus

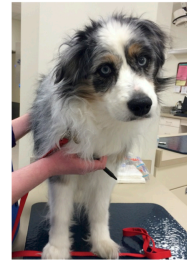

Grade 2 = Yes

30
