# Supplementary material for: Development and implementation of a novel immune thrombocytopenia bleeding score for dogs
Source: PubMed Central journal article supplement — J Vet Intern Med. 2018 Apr 21;32(3):1041–50. doi: 10.1111/jvim.15089 (PMC5980571; doi:10.1111/jvim.15089), 2018-04-21
Supplement: JVIM-32-1041-s003.pdf [file JVIM-32-1041-s003.pdf]

| Site                                            | Bleeding grade                            |                                           |                                           | Score given<br>Enter Grade OR X = not collected |         |         |
|-------------------------------------------------|-------------------------------------------|-------------------------------------------|-------------------------------------------|-------------------------------------------------|---------|---------|
|                                                 | 0                                         | 1                                         | 2                                         | Case #1                                         | Case #2 | Case #3 |
| Skin                                            | No                                        | Petechiae/ecchymoses<br>Single site       | Petechiae/ecchymoses<br>> 1 anatomic site |                                                 |         |         |
| Catheter/venipuncture/other cutaneous bleed     | No                                        | Self-limiting/<br>< 5 min                 | > 5 min and/or<br>intervention to control |                                                 |         |         |
| Oral mucosa                                     | No                                        | Petechiae                                 | Frank hemorrhage                          |                                                 |         |         |
| Intraocular                                     | No                                        | Funduscopy                                | Hyphema                                   |                                                 |         |         |
| Epistaxis                                       | No                                        | Unilateral and < 5 min                    | Bilateral or > 5 min                      |                                                 |         |         |
| Gastrointestinal                                | Occult blood -<br>(Hema-chek™<br>Guaic -) | Occult blood +<br>(Hema-chek™<br>Guaic +) | Hematemesis,<br>hematochezia, melena      |                                                 |         |         |
| Urinary                                         | No                                        | Microscopic<br>(dipstick)                 | Macroscopic                               |                                                 |         |         |
| Pulmonary (suspected/observed)                  | No                                        | N/A                                       | Yes                                       |                                                 |         |         |
| Intracranial hemorrhage<br>(suspected/observed) | No                                        | N/A                                       | Yes                                       |                                                 |         |         |
| Total Score (max =18)                           |                                           |                                           |                                           |                                                 |         |         |

**Supplemental Material S3.** Score sheet to record answers of the DOGiBAT quiz.
