# Supplementary material for: Development and implementation of a novel immune thrombocytopenia bleeding score for dogs
Source: PubMed Central journal article supplement — J Vet Intern Med. 2018 Apr 21;32(3):1041–50. doi: 10.1111/jvim.15089 (PMC5980571; doi:10.1111/jvim.15089), 2018-04-21
Supplement: JVIM-32-1041-s004.pdf [file JVIM-32-1041-s004.pdf]

| Site                                            | Bleeding grade                             |                                            |                                           | Score given<br>Enter Grade OR X = not collected |                |                |
|-------------------------------------------------|--------------------------------------------|--------------------------------------------|-------------------------------------------|-------------------------------------------------|----------------|----------------|
|                                                 | <b>0</b>                                   | <b>1</b>                                   | <b>2</b>                                  | <b>Case #1</b>                                  | <b>Case #2</b> | <b>Case #3</b> |
| Skin                                            | No                                         | Petechiae/ecchymoses<br>Single site        | Petechiae/ecchymoses<br>> 1 anatomic site | 2                                               | 2              | 1              |
| Catheter/venipuncture/other cutaneous bleed     | No                                         | Self-limiting/<br>< 5 min                  | > 5 min and/or<br>intervention to control | 0                                               | 0              | 2              |
| Oral mucosa                                     | No                                         | Petechiae                                  | Frank hemorrhage                          | 2                                               | 1              | 2              |
| Intraocular                                     | No                                         | Funduscopy                                 | Hyphema                                   | 2                                               | 0              | 2              |
| Epistaxis                                       | No                                         | Unilateral and < 5 min                     | Bilateral or > 5 min                      | 2                                               | 0              | 2              |
| Gastrointestinal                                | Occult blood -<br>(Hema-chek™<br>Guaiac -) | Occult blood +<br>(Hema-chek™<br>Guaiac +) | Hematemesis,<br>hematochezia, melena      | 2                                               | 2              | 2              |
| Urinary                                         | No                                         | Microscopic<br>(dipstick)                  | Macroscopic                               | 2                                               | 1              | 1              |
| Pulmonary (suspected/observed)                  | No                                         | N/A                                        | Yes                                       | 0                                               | 2              | 0              |
| Intracranial hemorrhage<br>(suspected/observed) | No                                         | N/A                                        | Yes                                       | 0                                               | 0              | 0              |
| Total Score (max =18)                           |                                            |                                            |                                           | 12                                              | 8              | 12             |

**Supplemental Material S4.** Answer key for the DOGIBAT quiz.
