# Supplementary material for: Development and implementation of a novel immune thrombocytopenia bleeding score for dogs
Source: PubMed Central journal article supplement — J Vet Intern Med. 2018 Apr 21;32(3):1041–50. doi: 10.1111/jvim.15089 (PMC5980571; doi:10.1111/jvim.15089), 2018-04-21
Supplement: JVIM-32-1041-s006.pdf [file JVIM-32-1041-s006.pdf]

**Supplemental Table S1.** Correlation data between clinical outcomes and admission DOGiBAT scores at individual anatomic sites in all enrolled dogs (n=61). Spearman correlation coefficients ( $r_s$ ) and p-values considered significant ( $p < 0.05$ ) are in bolded text.

\* Correlation data not available for intracranial bleeding due to lack of reported events.

|                  | Blood product administration |                   | Hospitalization length (days) |              | Survival to discharge |              |
|------------------|------------------------------|-------------------|-------------------------------|--------------|-----------------------|--------------|
|                  | $r_s$                        | p-value           | $r_s$                         | p-value      | $r_s$                 | p-value      |
| Skin             | <b>0.336</b>                 | <b>0.008</b>      | <b>0.303</b>                  | <b>0.018</b> | 0.01                  | 0.94         |
| Catheter, etc.   | <b>0.252</b>                 | <b>0.049</b>      | 0.232                         | 0.072        | -0.044                | 0.736        |
| Oral cavity      | <b>0.265</b>                 | <b>0.04</b>       | 0.195                         | 0.135        | -0.159                | 0.226        |
| Ocular           | 0.07                         | 0.6               | -0.055                        | 0.681        | <b>-0.314</b>         | <b>0.016</b> |
| Epistaxis        | -0.034                       | 0.797             | 0.152                         | 0.243        | -0.013                | 0.92         |
| Gastrointestinal | <b>0.438</b>                 | <b>0.002</b>      | 0.248                         | 0.096        | -0.185                | 0.218        |
| Urinary          | <b>0.337</b>                 | <b>0.015</b>      | 0.157                         | 0.265        | -0.114                | 0.422        |
| Pulmonary        | -0.074                       | 0.572             | 0.041                         | 0.755        | 0.039                 | 0.768        |
| Intracranial*    | --                           | --                | --                            | --           | --                    | --           |
| Total DOGiBAT    | <b>0.512</b>                 | <b>&lt;0.0001</b> | <b>0.35</b>                   | <b>0.006</b> | -0.168                | 0.197        |

**Supplemental Table S2.** Correlation data between clinical outcomes and admission DOGiBAT scores at individual anatomic sites in only dogs categorized as having primary immune thrombocytopenia (n=34). Spearman correlation coefficients ( $r_s$ ) and p-values considered significant ( $p < 0.05$ ) in bolded text.

\* Correlation data not available for intracranial bleeding due to lack of reported events.

| DOGiBAT site     | Blood product administration |              | Hospitalization length (days) |              | Survival to discharge |         |
|------------------|------------------------------|--------------|-------------------------------|--------------|-----------------------|---------|
|                  | $r_s$                        | p-value      | $r_s$                         | p-value      | $r_s$                 | p-value |
| Skin             | 0.263                        | 0.133        | <b>0.377</b>                  | <b>0.028</b> | 0.04                  | 0.823   |
| Catheter, etc.   | 0.183                        | 0.3          | 0.145                         | 0.411        | -0.166                | 0.349   |
| Oral cavity      | <b>0.345</b>                 | <b>0.049</b> | <b>0.364</b>                  | <b>0.038</b> | -0.166                | 0.356   |
| Ocular           | 0.096                        | 0.601        | 0.012                         | 0.948        | -0.222                | 0.221   |
| Epistaxis        | -0.099                       | 0.576        | 0.137                         | 0.441        | 0.114                 | 0.522   |
| Gastrointestinal | <b>0.39</b>                  | <b>0.044</b> | 0.199                         | 0.32         | -0.246                | 0.215   |
| Urinary          | 0.331                        | 0.074        | 0.143                         | 0.453        | 0.062                 | 0.744   |
| Pulmonary        | -0.137                       | 0.44         | 0.063                         | 0.724        | 0.054                 | 0.761   |
| Intracranial *   | --                           | --           | --                            | --           | --                    | --      |
| Total DOGiBAT    | <b>0.541</b>                 | <b>0.001</b> | <b>0.452</b>                  | <b>0.007</b> | -0.123                | 0.49    |
